# Supplementary material for: The role of humic acid aggregation on the kinetics of photosensitized singlet oxygen production and decay
Source: Royal Society of Chemistry journal article supplement (doi:10.1039/c1pp00003a), 2011-03-23
Supplement: c1pp00003a.pdf [file c1pp00003a.pdf]

## SUPPORTING INFORMATION

### The Role of Humic Acid Aggregation on the Kinetics of Photosensitized Singlet Oxygen Production and Decay.

Luciano Carlos, Brian W. Pedersen, Peter R. Ogilby\*, and Daniel O. Mártire\*

Number of pages: 6

Number of Figures: 9

#### Contents:

|                                                                                                    |    |
|----------------------------------------------------------------------------------------------------|----|
| Porphyrin structures (Figure S1) .....                                                             | S2 |
| Microscope images of HA aggregates containing TMPyP washed with D <sub>2</sub> O (Figure S2) ..... | S3 |
| Microscope images of HA aggregates containing TPP washed with D <sub>2</sub> O (Figure S3) .....   | S3 |
| Microscope images of HA aggregates containing TMPyP washed with HA (Figure S4) .....               | S4 |
| Microscope images of HA aggregates containing TPP washed with HA (Figure S5) .....                 | S4 |
| Microscope images before and after the irradiation of HA aggregates (Figure S6) .....              | S5 |
| Microscope images before and after the irradiation of HA aggregates (Figure S7) .....              | S5 |
| Time-resolved signals recorded at 1270 nm (Figure S8) .....                                        | S6 |
| Time-resolved signals recorded at 1270 nm (Figure S9) .....                                        | S6 |

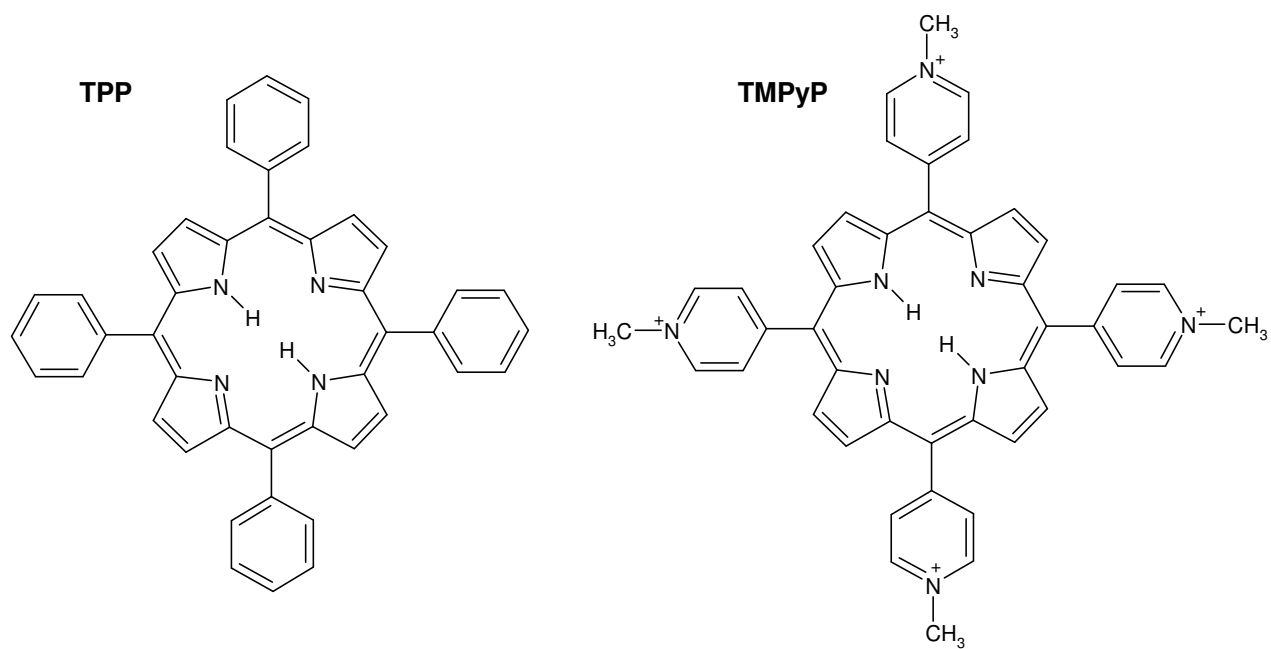

**Figure S1.** Structure of the porphyrins used as independent  $O_2(a^1\Delta_g)$  sensitizers in this study.

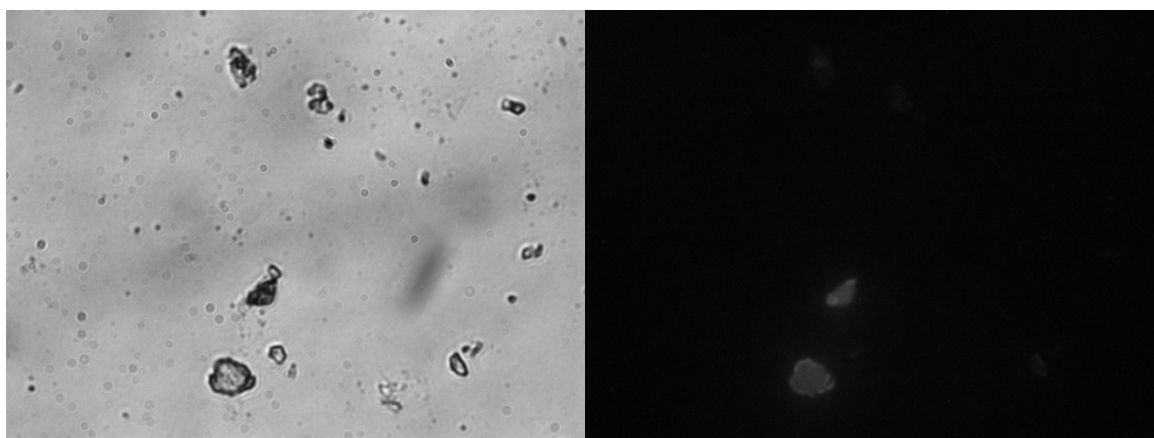

**Figure S3.** Bright-field (left) and fluorescence (right) images of the HA aggregates containing TMPyP washed with D<sub>2</sub>O.

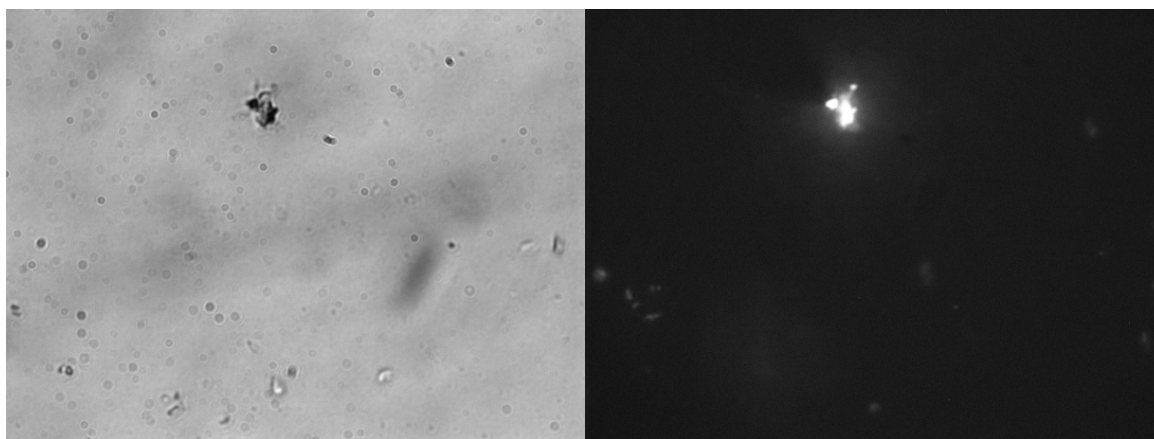

**Figure S4.** Bright-field (left) and fluorescence (right) images of the HA aggregates containing TPP washed with D<sub>2</sub>O.

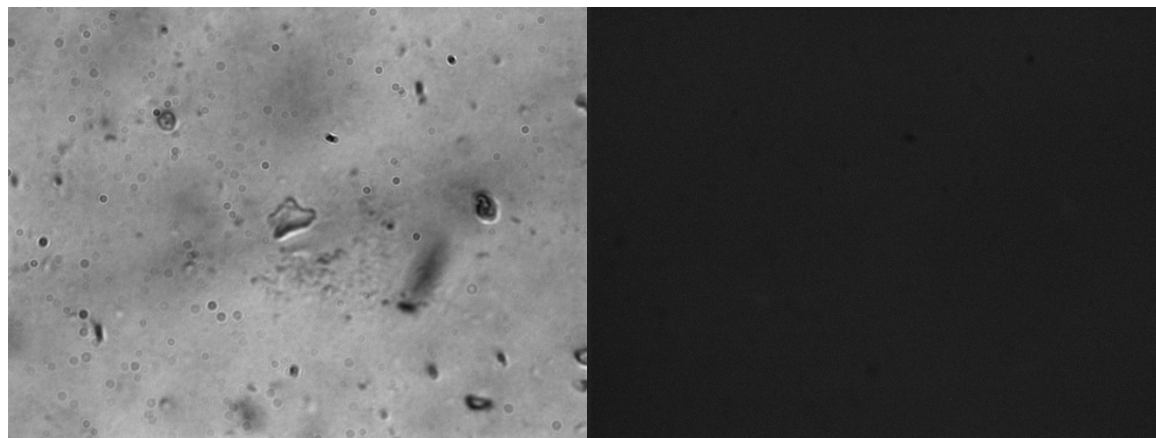

**Figure S5.** Bright-field (left) and fluorescence (right) images of the HA aggregates containing TMPyP washed with HA dispersion.

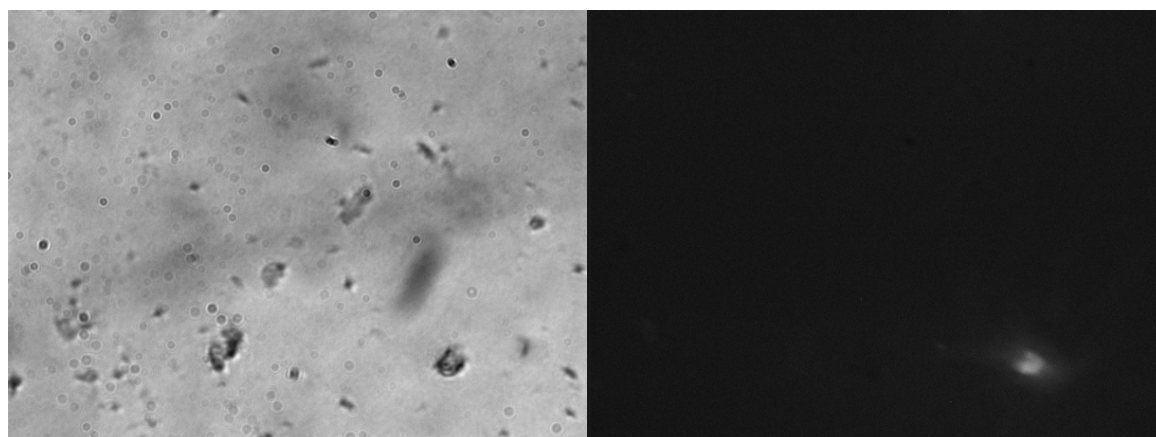

**Figure S6.** Bright-field (left) and fluorescence (right) images of the HA aggregates containing TPP washed with HA dispersion.

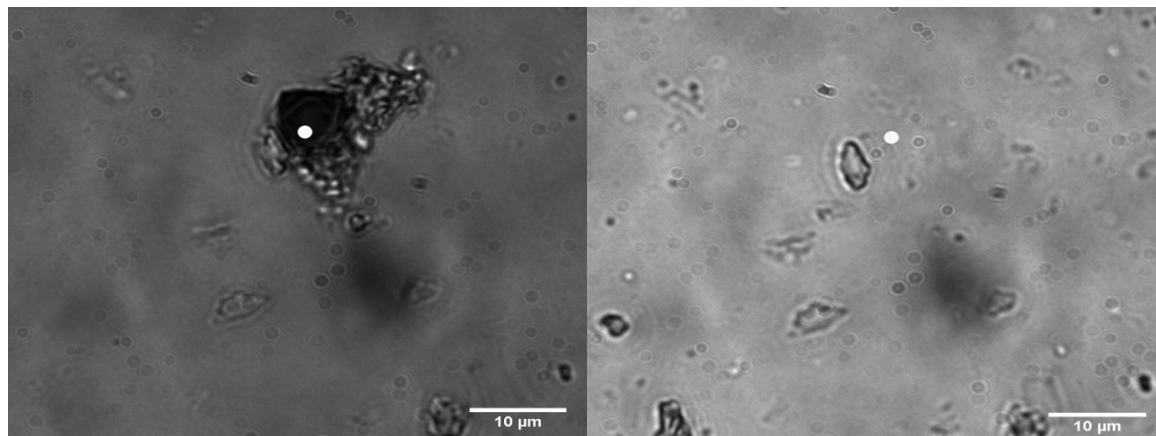

**Figure S7.** Bright-field images before (left) and after (right) the irradiation of the HA aggregates containing TMPyP. The superimposed white spots approximate the cross sectional area at the waist of the focused 420 nm laser beam.

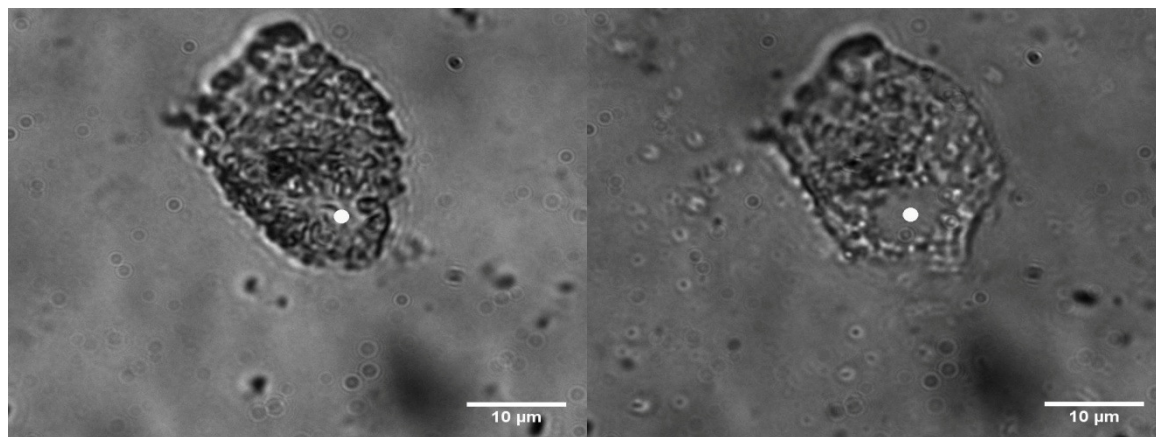

**Figure S8.** Bright-field images before (left) and after (right) the irradiation of the HA aggregates containing TMPyP. The superimposed white spots approximate the cross sectional area at the waist of the focused 420 nm laser beam.

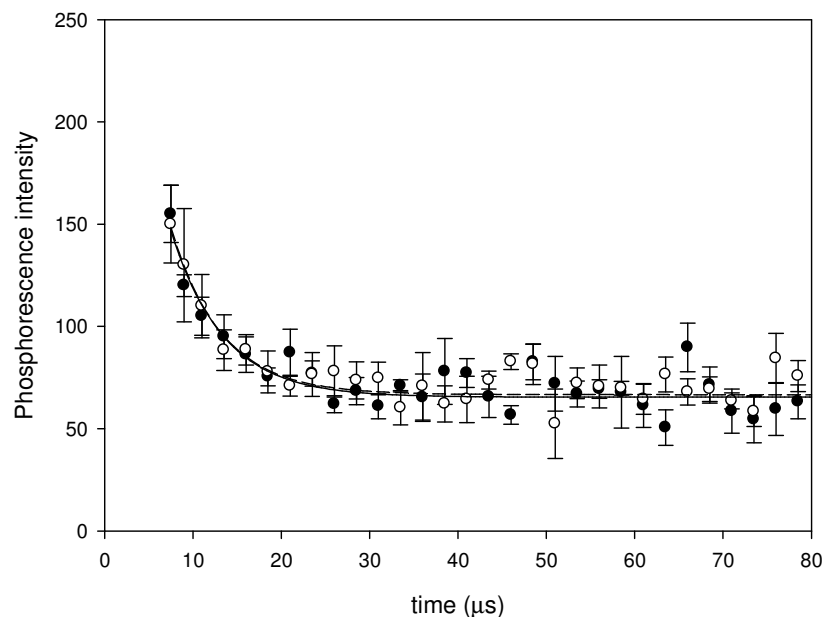

**Figure S9.** Comparison between time-resolved signals recorded at 1270 nm upon irradiation on the bulk solution HA dispersion containing TMPyP (●) and TPP (○).

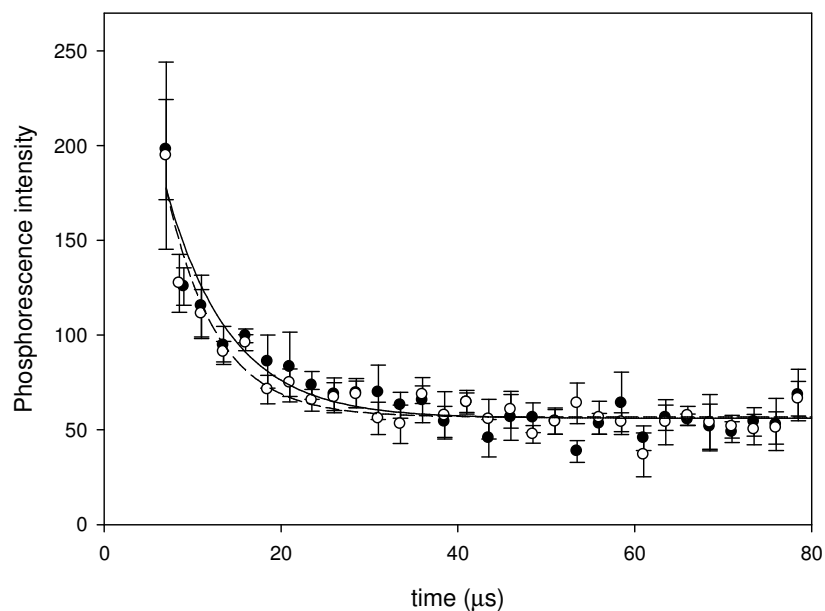

**Figure S10.** Comparison between time-resolved signals recorded at 1270 nm upon irradiation on HA aggregate containing TPP exposed to an atmosphere of N<sub>2</sub> (●) and O<sub>2</sub> (○).
